# Supplementary material for: Exploration of the active sites on a Rh–In2O3 catalyst for the semi-hydrogenation of acetylene: a theoretical study
Source: Royal Society of Chemistry journal article supplement (doi:10.1039/d3cy01740k), 2024-01-01
Supplement: d3cy01740k1.pdf [file d3cy01740k1.pdf]

## Supplementary Materials

### Exploration of the active sites on the Rh-In<sub>2</sub>O<sub>3</sub> catalyst for the semi-hydrogenation of acetylene: A theoretical study

Kaihang Sun,<sup>a</sup> Rui Zou,<sup>a</sup> Chenyang Shen<sup>a</sup> and Chang-jun Liu<sup>\*ab</sup>

---

<sup>a</sup> School of Chemical Engineering and Technology, Tianjin University, Tianjin 300350, China

<sup>b</sup> Collaborative Innovation Center of Chemical Science & Engineering, Tianjin University, Tianjin 300072, China

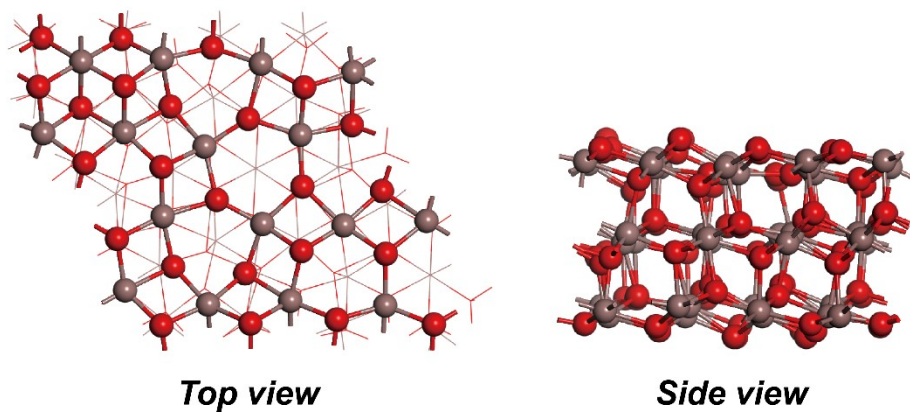

Fig. S1 Configuration of  $\text{In}_2\text{O}_3(111)$  model

---

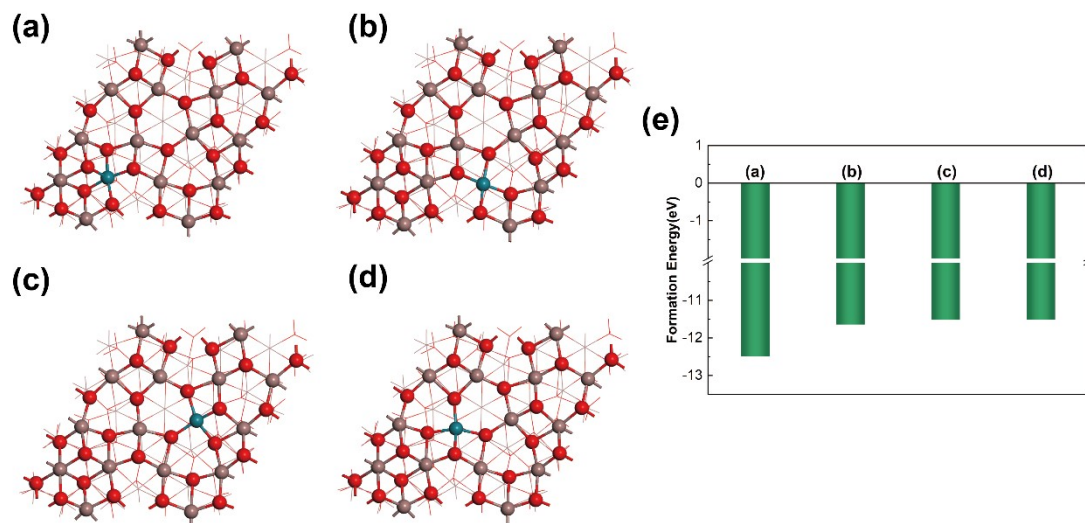

Fig. S2 Configurations of (a-d) four potential sites of Rh single atom and (e) the comparison of surface formation energies

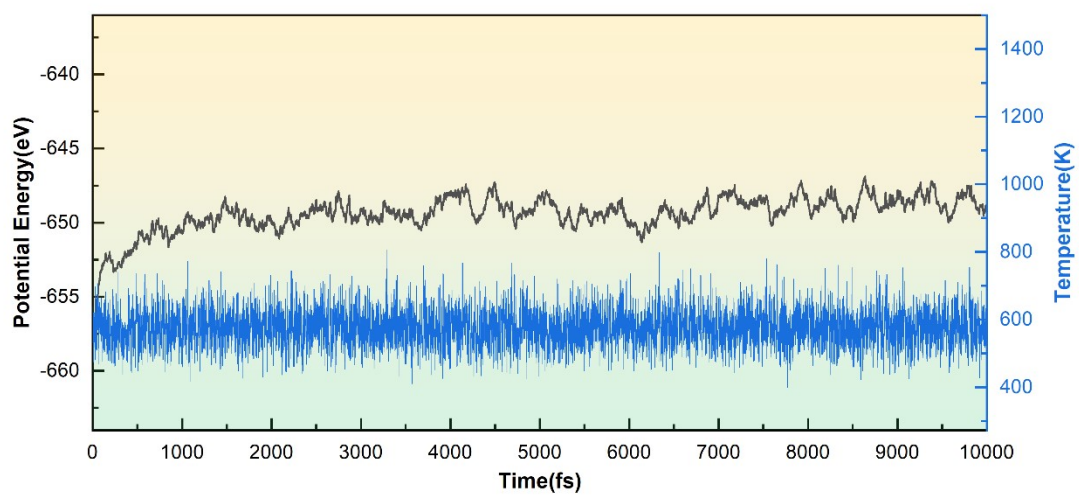

Fig. S3 The potential energy and temperature of the Rh<sub>1</sub>/In<sub>2</sub>O<sub>3</sub> model during the AIMD simulation

---

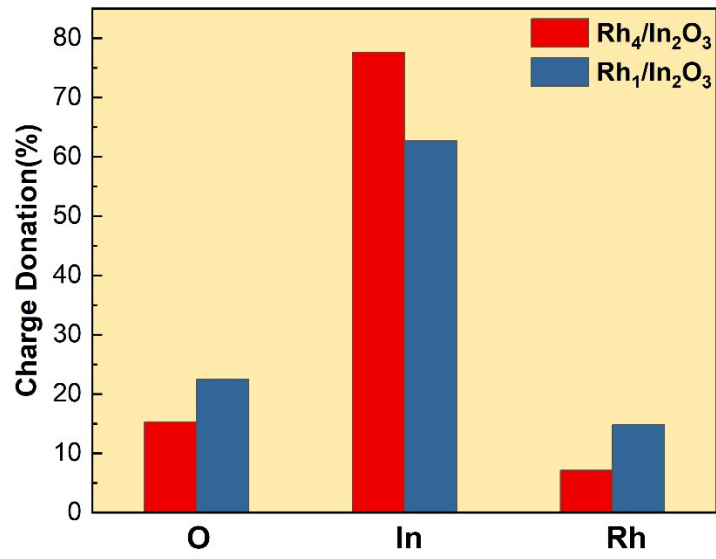

Fig. S4 The charge donation of oxygen vacancy over the Rh<sub>4</sub>/In<sub>2</sub>O<sub>3</sub> and Rh<sub>1</sub>/In<sub>2</sub>O<sub>3</sub> models

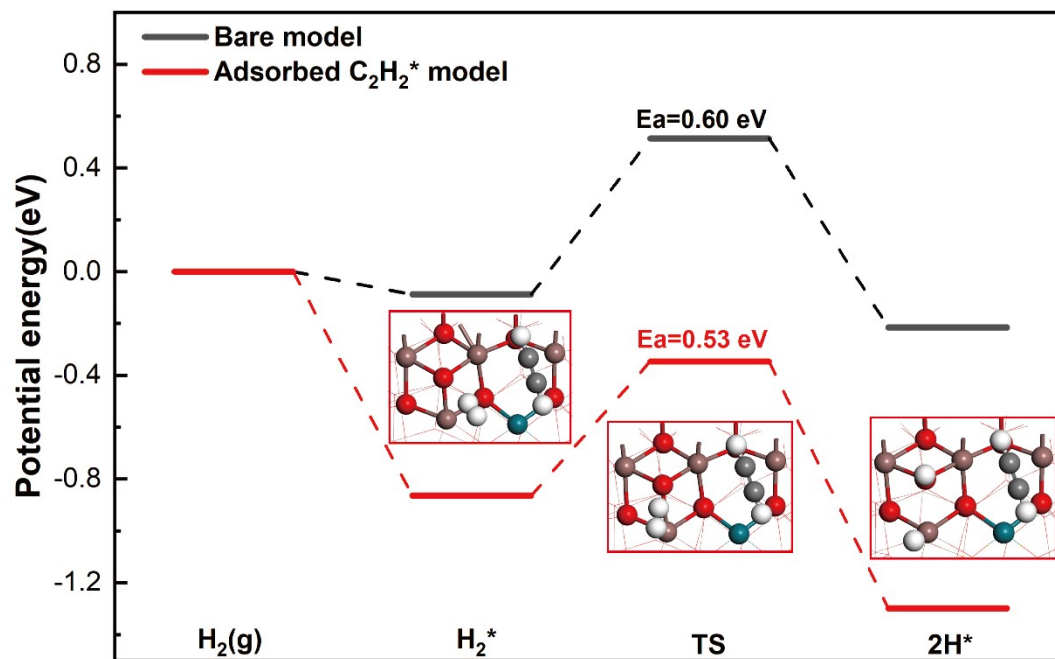

Fig. S5 Adsorption and dissociation of H<sub>2</sub> molecule over the Rh<sub>1</sub>/In<sub>2</sub>O<sub>3</sub>\_Ov site with and without C<sub>2</sub>H<sub>2</sub> adsorption

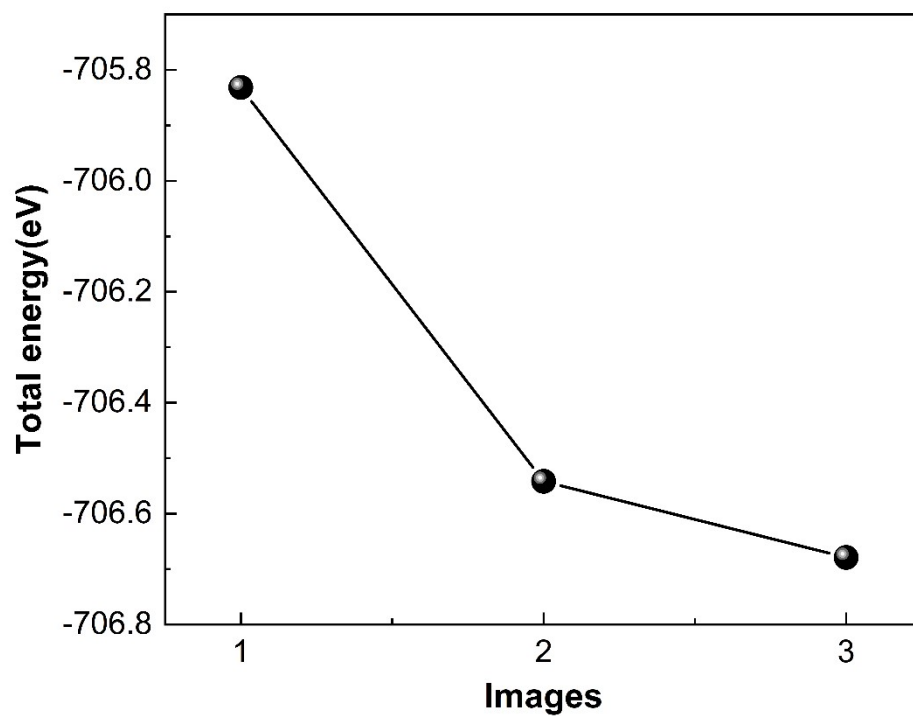

Fig. S6 CI-NEB trajectories for  $C_2H_2^*$  hydrogenation to  $C_2H_3^*$  over the supported  $Rh_4$  site

---

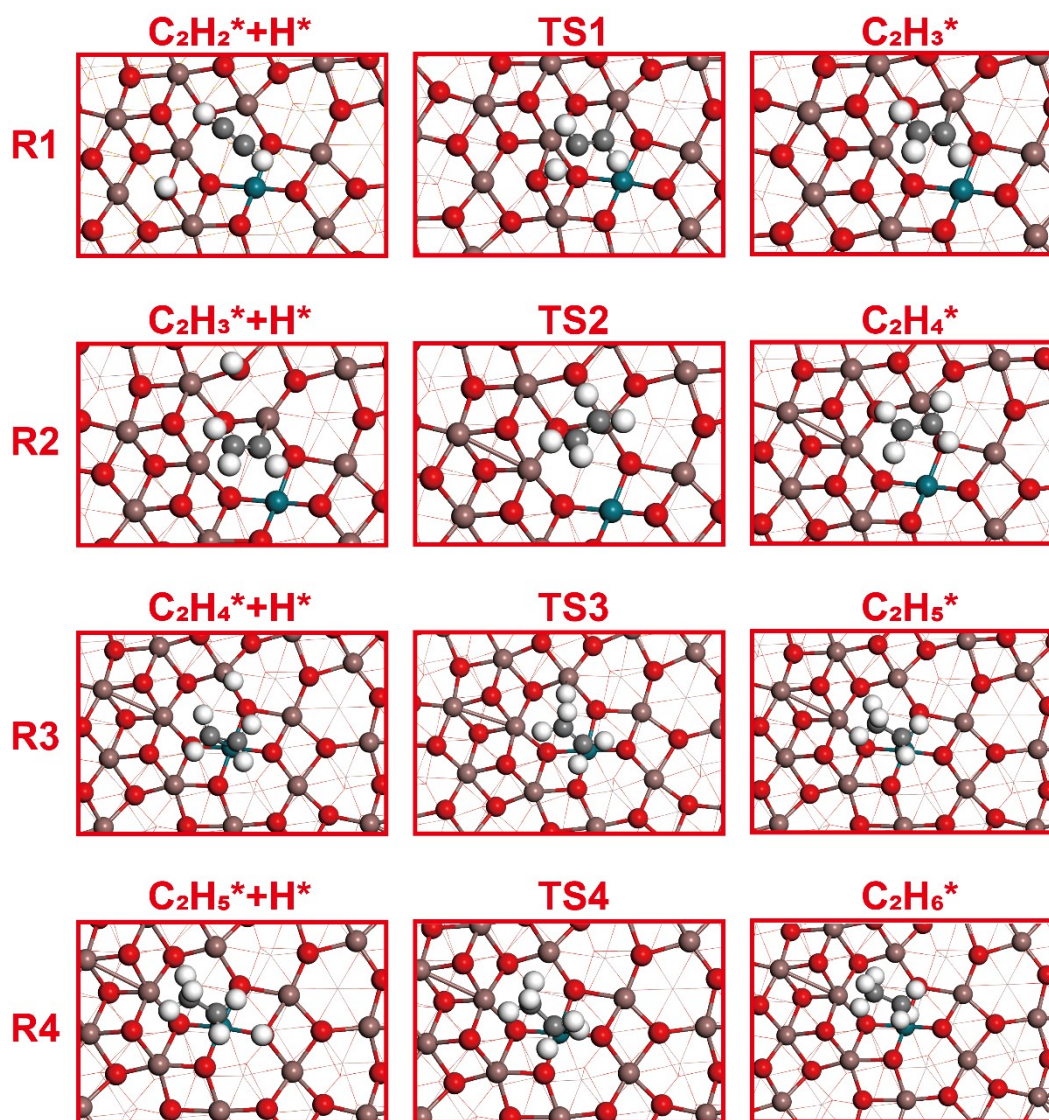

Fig. S7 Configurations of the intermediates involved acetylene hydrogenation over the Rh<sub>1</sub>/In<sub>2</sub>O<sub>3</sub>\_Ov site



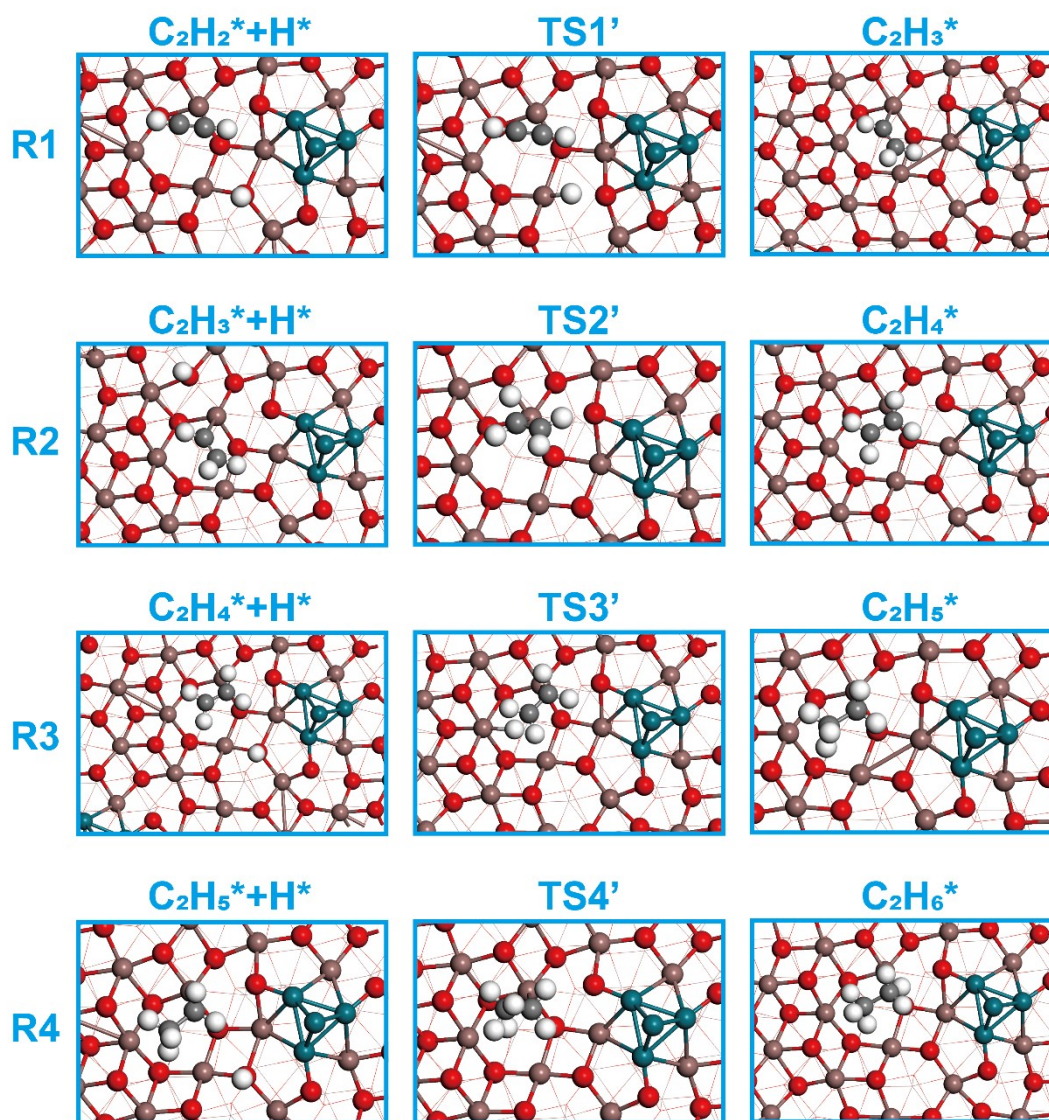

Fig. S8 Configurations of the intermediates involved acetylene hydrogenation over the Rh<sub>4</sub>/In<sub>2</sub>O<sub>3</sub>\_Ov site

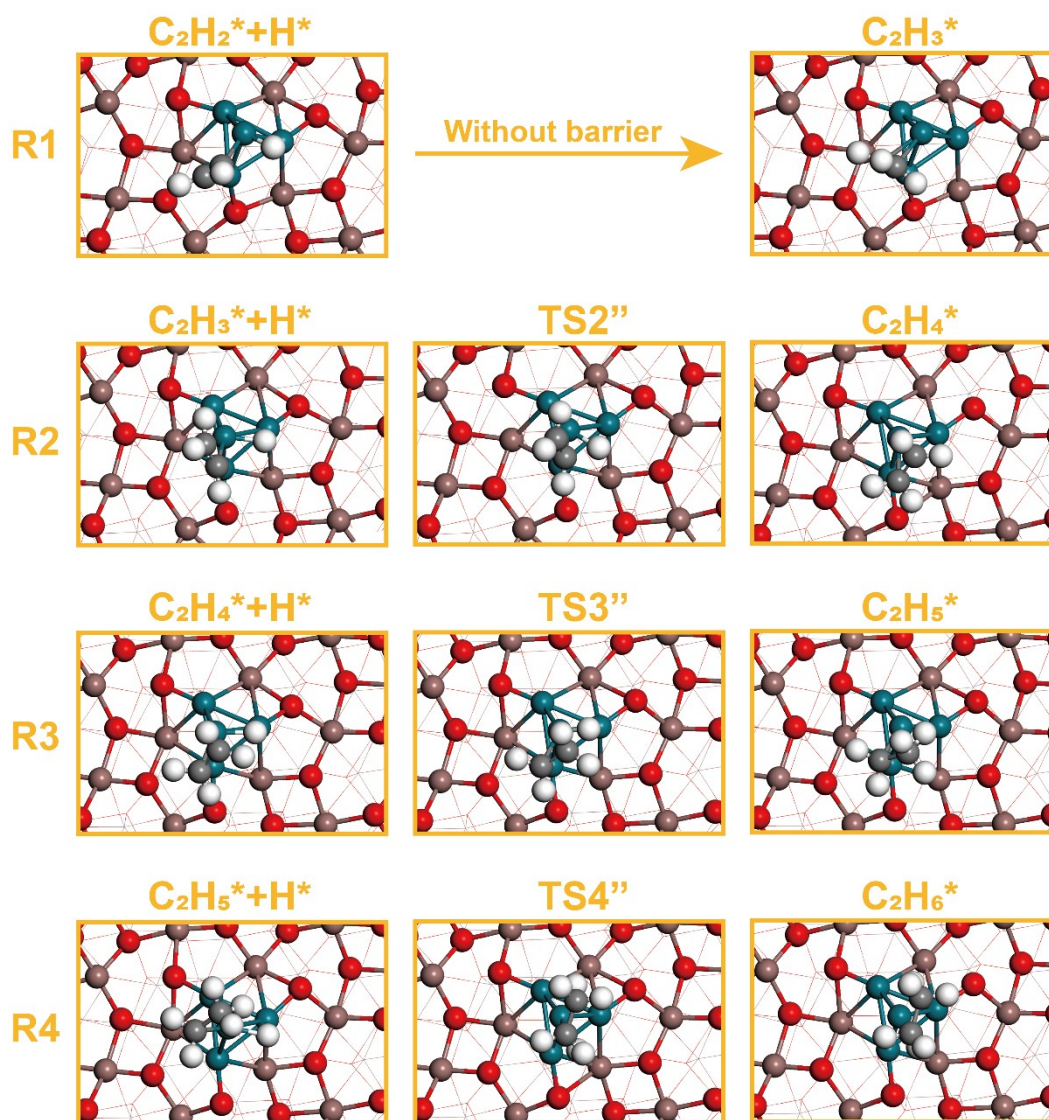

Fig. S9 Configurations of the intermediates involved acetylene hydrogenation over the  $Rh_4/In_2O_3$   $Rh_4$  site
